# Supplementary material for: TNFα signalling primes chromatin for NF-κB binding and induces rapid and widespread nucleosome repositioning
Source: PubMed Central journal article supplement (PMC4268828; doi:10.1186/s13059-014-0536-6), 2014-12-03
Supplement: 13059_2014_536_MOESM2_ESM.pdf [file 13059_2014_536_MOESM2_ESM.pdf]

## Additional File 2

### A RNA-seq (30- v 0-min post-TNF $\alpha$ )

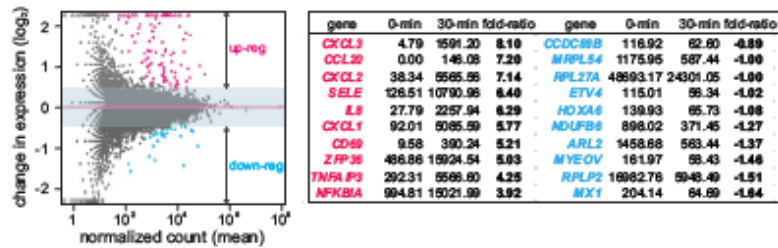

### B p65-proximal genes

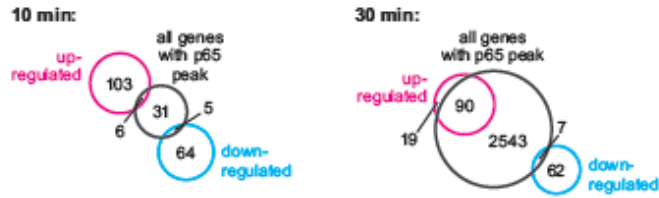

### C Browser views of typical genes

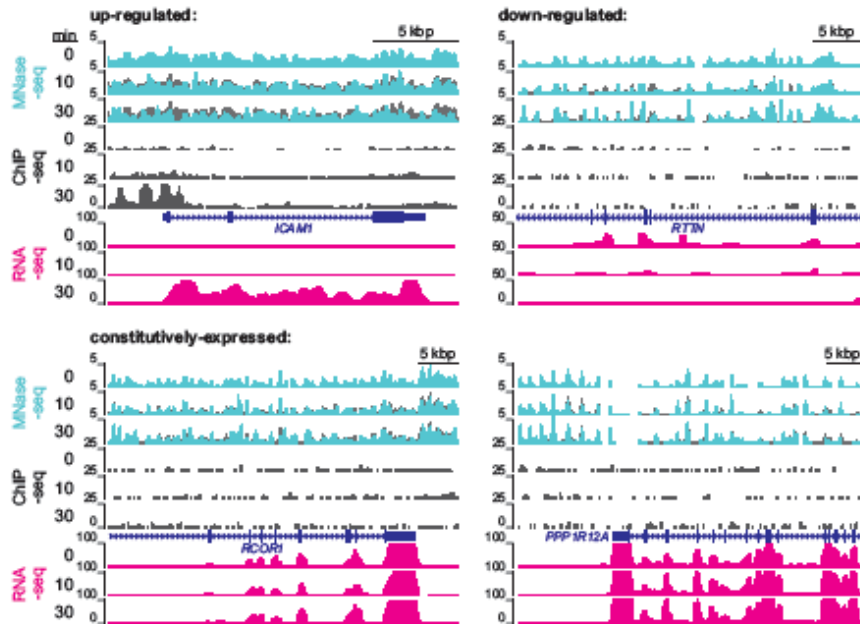

**Additional File 2 | TNF $\alpha$ -regulated genes and expression levels.** (A) Changes in gene expression assessed by RNA-seq. Total RNA was isolated from HUVECs 0 or 30 min post-stimulation, rRNA-depleted, deep-sequenced, and numbers of reads mapping to genes (normalized to library size) determined. *Left:* Read numbers for each gene (single dot) are plotted against change in expression; up-/down-regulated genes (*red* and *blue* dots, respectively) were selected using a  $\pm 0.6 \log_2$  (~1.5-fold) and  $\geq 100$  reads/gene cutoff. *Right:* details for the 10 most up-/down-regulated genes after 30 min (raw read counts per gene model at the relevant times, and fold change between the two). (B) Differentially-regulated genes proximal to p65 peaks. Venn diagrams show the number of RefSeq genes that were up-/down-regulated 30 min post-stimulation (*red/blue*; from panel A) and marked by p65 peaks lying within 2 kbp of the gene after 10 or 30 min. (C) Browser views (*y-axis:* reads per million) illustrating data for typical up-/down-regulated and constitutively-expressed genes obtained by MNase-seq (0-min levels in *grey* underlie 10- and 30-min in *green* to facilitate comparison), p65 ChIP-seq (*dark grey*), and RNA-seq (*magenta*) at the same time-points.
