# Supplementary material for: TNFα signalling primes chromatin for NF-κB binding and induces rapid and widespread nucleosome repositioning
Source: PubMed Central journal article supplement (PMC4268828; doi:10.1186/s13059-014-0536-6), 2014-12-03
Supplement: 13059_2014_536_MOESM5_ESM.pdf [file 13059_2014_536_MOESM5_ESM.pdf]

## Additional File 5

### A Nucleosome repositioning precedes RNAPII elongation

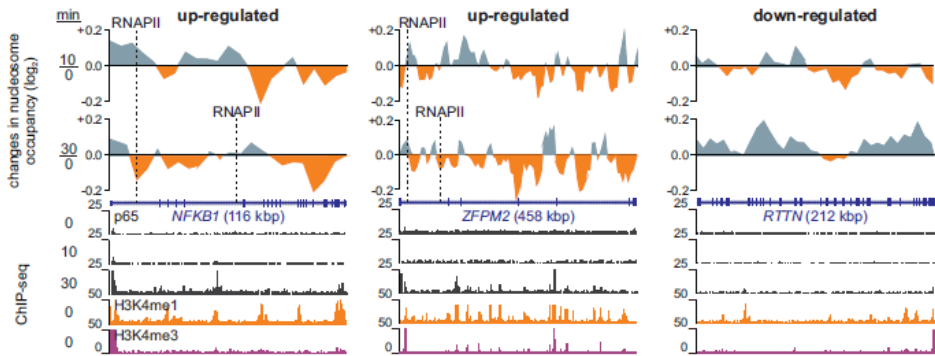

### B Gene examples (30 min compared to 0 min)

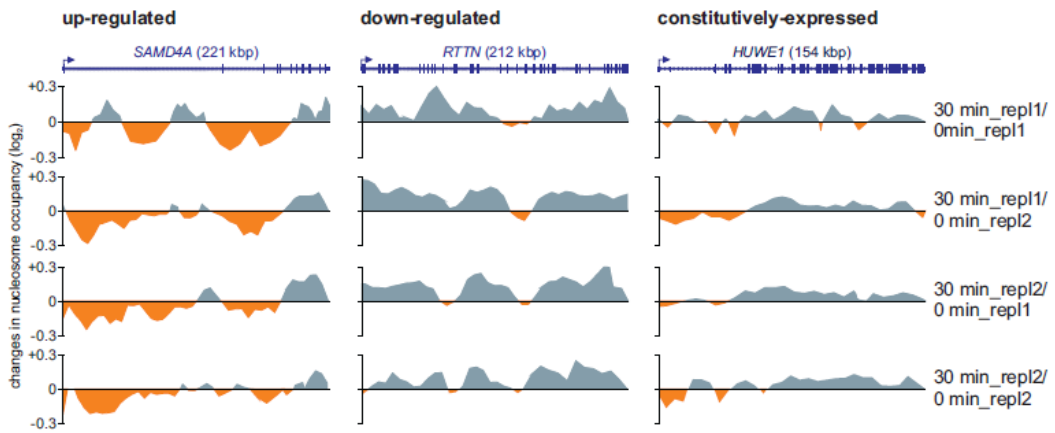

**Additional File 5 | Changes in nucleosome occupancy along genes.** (A) Browser views showing ( $\log_2$  fold) changes in nucleosome occupancy at 10 or 30 min (determined as in **Figure 2**; enrichment: *grey*, depletion: *orange*) along three long genes. Tracks for p65 (*black*), H3K4me1 (*orange*), and H3K4me3 (*purple*) ChIP-seq are shown below (*y-axis*: reads/million). (B) Reproducibility of observed changes in nucleosome occupancy (determined as in **Figure 2**). 0- and 30-min MNase-seq data from two biological replicates (“repl1” and “repl2”), compared in all pairwise combinations, yield similar enrichment/depletion profiles; typical examples of up-, down-regulated, and constitutively-expressed genes are shown.
